# Supplementary material
Source: HighWire-hosted journal article supplement (https://cmajopen.ca/highwire/filestream/81146/field_highwire_adjunct_files/0/2017-0152-1-at.pdf)

## Appendix 1 (as supplied by the authors)

### Data Quality Review

An annual data quality review of the preceding fiscal year data is conducted by senior staff that are part of the Data Quality Team. Various data elements, considered as determinants of sound data quality, are evaluated and rated for each agency during this review: 1) new versus carried over admissions, 2) inactive admissions, 3) program registrations and terminations, 4) program average sessions, length of stay and direct service hours, 5), programs with inactive registrations, 6) programs with no direct service on start date, 7) wait list statistics, 8) residential programs with length of stay  $\geq 2$  times the average length of stay, 9) activity log services, 10) duplicate records, 11) unknown clients postal codes, 12) unknown responses on admission screen, 13) outgoing referrals, 14) interface data quality and completeness. A weighted, aggregate data quality score based on these data elements is derived for each agency, with a “pass” threshold set at 65%. The results of the data quality review are communicated to the agency, with comments and recommendations provided to improve reporting. Mean data quality scores in recent years have ranged from 66.4% in 2013/14, 65.9% in 2014/15 to 64.4% in 2015/16. In each of these years, about 60% of agencies have obtained passing scores (60.7% in 2013/14, 58.9% in 2014/15 and 54.0% in 2015/16).

### Classification Methodology

Admissions were categorized into fiscal years ranging from 2010/11 to 2015/16 based on their start dates. For each fiscal year, the first admission was selected as a new admission, with preference given to cannabis plus over cannabis only admissions, if both existed. This decision was made to prevent misclassification, as clients often recognize other substance problems once they begin an interaction with the addiction treatment system. Carryover admissions (i.e. admissions continuing from previous fiscal years) were selected if a client did not begin an admission in the fiscal year. As before, preference was given to cannabis plus carryover admissions over cannabis only carryover admissions. For all clients, the most wide-ranging carryover admissions were selected, with representation ensured across all fiscal years where treatment was received. In the event of duplicate carryover admissions, selection for the fiscal year was dependent on the start date of the admissions. On the other hand, length and end date of the admissions guided the selection for the fiscal year when overlapping carryover admissions were encountered.

### Ethics Compliance

Approval to access the data was obtained from the research ethics board at the Centre for Addiction and Mental Health (Protocol Reference # 012/2017). All data analyzed were de-identified and cells of less than five in cross-tabulations were suppressed in the presentation of the results.

**Table S1: Treatment agencies reporting data to the Drug and Alcohol Treatment Information System between 2010/11 – 2015/16**

| Agency Name                                                                       | 2010/11 | 2011/12 | 2012/13 | 2013/14 | 2014/15 | 2015/16 |
|-----------------------------------------------------------------------------------|---------|---------|---------|---------|---------|---------|
| Holmes House Haldimand-Norfolk Withdrawal Management & Rehabilitation Service     | Y       | Y       | Y       | Y       | Y       | Y       |
| Grey Bruce Health Services                                                        | Y       | Y       | Y       | Y       | Y       | Y       |
| Westover Treatment Centre                                                         | Y       | Y       | Y       | Y       | Y       | Y       |
| Maison Renaissance                                                                | Y       | Y       | Y       | Y       | Y       | Y       |
| Maison Arc-En-Ciel                                                                | Y       | Y       | Y       | Y       | Y       | Y       |
| Sault Area Hospital Community Addiction Services                                  | Y       | Y       | Y       | Y       | Y       | Y       |
| St. Joseph's Healthcare Hamilton - Womankind Addiction Services                   | Y       | Y       | Y       | Y       | Y       | Y       |
| St. Joseph's Healthcare Hamilton (SJHH) - Men's Addiction Service Hamilton (MASH) | Y       | Y       | Y       | Y       | Y       | Y       |
| Counselling Centre of East Algoma, Family Addictions Program                      | Y       | Y       | Y       | Y       | Y       | Y       |
| Addiction Services of Thames Valley (ADS)                                         | Y       | Y       | Y       | Y       | Y       | Y       |
| Portage Ontario                                                                   | Y       | Y       | Y       | Y       | Y       | Y       |
| Brentwood Recovery Home                                                           | Y       | Y       | Y       | Y       | Y       | Y       |
| Windsor Downtown Mission                                                          | N       | N       | Y       | N       | Y       | Y       |
| Hotel Dieu Hospital Withdrawal Management Centre                                  | Y       | Y       | Y       | Y       | Y       | Y       |
| Addictions and Mental Health Services Hastings Prince Edward                      | Y       | Y       | Y       | Y       | Y       | Y       |
| G&B House                                                                         | Y       | Y       | Y       | Y       | Y       | Y       |
| Hope Place Centres                                                                | Y       | Y       | Y       | Y       | Y       | Y       |
| Addiction Services - Bluewater Health                                             | Y       | Y       | Y       | Y       | Y       | Y       |
| House of Friendship, Addiction Services                                           | Y       | Y       | Y       | Y       | Y       | Y       |
| Salvation Army Hope Acres Rehabilitation Centre                                   | Y       | Y       | Y       | Y       | Y       | Y       |
| Canadian Mental Health Association – Simcoe Branch                                | Y       | Y       | Y       | Y       | Y       | Y       |

Imtiaz S, Kurdyak P, Samkhvalov AV, et al. Trends in treatment of problematic cannabis use in Ontario's specialized addiction treatment system from 2010/11 to 2015/16: a repeated cross-sectional study of a health administrative database. *CMAJ Open* 2018. doi: 10.9778/cmajo.20170152. Copyright© 2018 Joule Inc. or its licensors

|                                                                                              |   |   |   |   |   |   |
|----------------------------------------------------------------------------------------------|---|---|---|---|---|---|
| Choices for Change, Alcohol, Drug and Gambling Counselling Centre                            | Y | Y | Y | Y | Y | Y |
| Royal Victoria Regional Health Centre Mental Health and Addiction Program Addiction Services | Y | Y | Y | Y | Y | Y |
| Pinewood Centre of Lakeridge Health                                                          | Y | Y | Y | Y | Y | Y |
| Peel Addiction Assessment and Referral Centre                                                | Y | Y | Y | Y | Y | Y |
| Quintin Warner House                                                                         | Y | Y | Y | Y | Y | Y |
| ADAPT (Alcohol, Drug, Gambling Assessment, Prevention & Treatment Services)                  | Y | Y | Y | Y | Y | Y |
| Salvation Army Kingston Harbour Light                                                        | Y | Y | Y | Y | Y | Y |
| Turning Point                                                                                | Y | Y | Y | Y | Y | Y |
| Seven South Street Treatment Centre                                                          | Y | Y | Y | Y | Y | Y |
| St. Joseph's Health Centre Withdrawal Management Services - Toronto                          | Y | Y | Y | Y | Y | Y |
| Toronto East Health Network                                                                  | Y | Y | Y | Y | Y | Y |
| Street Haven at the Crossroads                                                               | Y | Y | Y | Y | Y | Y |
| St. Michael's Withdrawal Management Services                                                 | Y | Y | Y | Y | Y | Y |
| HopeGreyBruce Mental Health and Addictions Services                                          | Y | Y | Y | Y | Y | Y |
| Wayside House of Hamilton                                                                    | Y | Y | Y | Y | Y | Y |
| YMCA Youth Substance Abuse Program                                                           | Y | Y | Y | Y | Y | Y |
| St. Leonard's Community Services                                                             | Y | Y | Y | Y | Y | Y |
| Crossroads Centre Incorporated                                                               | Y | Y | Y | Y | Y | Y |
| Hospital for Sick Children, Substance Abuse Program                                          | Y | Y | Y | Y | Y | Y |
| Serenity House Inc.                                                                          | Y | Y | Y | Y | Y | Y |
| Champlain District System Assessment Worker                                                  | Y | Y | Y | N | N | N |
| 3 C's Reintroduction Centre                                                                  | Y | Y | Y | Y | Y | Y |
| Dilico Ojibway Treatment Centre                                                              | Y | Y | Y | N | N | N |
| MacKay Manor Inc.                                                                            | Y | Y | Y | Y | Y | Y |
| Wayside House of St. Catharines                                                              | Y | Y | Y | Y | Y | Y |
| Pathways Alcohol and Drug Treatment Services of Renfrew County                               | Y | Y | Y | Y | Y | Y |
| Addictions Treatment Service                                                                 | Y | Y | Y | Y | Y | Y |

|                                                                              |   |   |   |   |   |   |
|------------------------------------------------------------------------------|---|---|---|---|---|---|
| Cornwall Community Hospital - Community Addiction and Mental Health Programs | Y | Y | Y | Y | Y | Y |
| Addictions and Problem Gambling Services of Ottawa                           | Y | Y | Y | Y | Y | Y |
| Salvation Army Addiction and Rehabilitation Centre (Sudbury)                 | Y | Y | Y | Y | N | N |
| Billy Buffet's House of Welcome Inc. and Billy's House of Transition Inc.    | Y | Y | Y | Y | Y | Y |
| Lanark, Leeds and Grenville Addictions and Mental Health (LLG AMH)           | Y | Y | Y | Y | Y | Y |
| Alliance Centre, Addiction Counselling For Youth and Adults                  | Y | Y | Y | Y | Y | Y |
| South Cochrane Addiction Services                                            | Y | Y | Y | Y | Y | Y |
| Community Counselling Centre - Addiction Services of Nipissing               | Y | Y | Y | Y | Y | Y |
| Breakaway Addiction Services                                                 | Y | Y | Y | Y | Y | Y |
| New Port Centre                                                              | Y | Y | Y | Y | Y | Y |
| Waterloo Regional Withdrawal Management Centre                               | Y | Y | Y | Y | Y | Y |
| North Bay Recovery Home                                                      | Y | Y | Y | Y | Y | Y |
| Community Addiction Services of Niagara                                      | Y | Y | Y | Y | Y | Y |
| Algoma Family Services                                                       | Y | Y | Y | Y | Y | Y |
| Ken Brown Recovery Home                                                      | Y | Y | Y | Y | Y | Y |
| Breton House                                                                 | Y | Y | Y | Y | Y | Y |
| ARID (Alcohol Recovery in Dignity)                                           | Y | Y | Y | Y | Y | Y |
| Chatham-Kent Addictions Program (C-KAP)                                      | Y | Y | Y | Y | Y | Y |
| Benbowopka Treatment Centre                                                  | Y | Y | Y | Y | Y | Y |
| St. Joseph's General Hospital Elliot Lake                                    | Y | Y | Y | Y | Y | Y |
| Stonehenge Therapeutic Community                                             | Y | Y | Y | Y | Y | Y |
| Cochrane District Detox Centre                                               | Y | Y | Y | Y | Y | Y |
| Community Alcohol/Drug Assessment Program, Algoma Public Health              | Y | Y | Y | Y | Y | Y |
| Humber River Hospital                                                        | Y | Y | Y | Y | Y | Y |
| Vesta Recovery Program for Women                                             | Y | Y | Y | Y | Y | Y |
| Alcohol, Drug and Gambling Services                                          | Y | Y | Y | Y | Y | Y |
| Jubilee Centre Inc.                                                          | Y | Y | Y | Y | Y | Y |
| N'Swakamok Native Friendship Centre                                          | Y | Y | Y | Y | Y | Y |

Imtiaz S, Kurdyak P, Samkhvalov AV, et al. Trends in treatment of problematic cannabis use in Ontario's specialized addiction treatment system from 2010/11 to 2015/16: a repeated cross-sectional study of a health administrative database. *CMAJ Open* 2018. doi: 10.9778/cmajo.20170152. Copyright© 2018 Joule Inc. or its licensors

|                                                                     |   |   |   |   |   |   |
|---------------------------------------------------------------------|---|---|---|---|---|---|
| Four Counties Addiction Services Team Inc. (FOURCAST)               | Y | Y | Y | Y | Y | Y |
| Sobriety House                                                      | Y | Y | Y | Y | Y | Y |
| AY Alternatives for Youth Hamilton                                  | Y | Y | Y | Y | Y | Y |
| Homewood Community Addiction Services                               | Y | Y | Y | Y | Y | Y |
| House of Sophrosyne                                                 | Y | Y | Y | Y | Y | Y |
| North Cochrane Addictions Services Inc. (NCAS)                      | Y | Y | Y | Y | Y | Y |
| Montfort Renaissance Inc.                                           | Y | Y | Y | Y | Y | Y |
| Ottawa Addiction Assessment Referral Service (OAARS)                | N | N | Y | Y | Y | Y |
| Community Addiction and Mental Health Services of Haldimond-Norfolk | Y | Y | Y | Y | Y | Y |
| St. Mary's Counselling Service (SMCS)                               | Y | Y | Y | Y | Y | Y |
| St. Michael's Homes                                                 | Y | Y | Y | Y | Y | Y |
| Lennox and Addington Addiction Services                             | Y | Y | Y | N | N | N |
| Dryden Regional Mental Health and Addiction Services                | N | N | Y | Y | Y | Y |
| Atikokan Community Counselling, Drug/Alcohol Program                | Y | Y | Y | Y | Y | Y |
| Community Counselling & Addiction Services (CCAS)                   | N | N | N | Y | Y | Y |
| Lake of the Woods District Hospital - Addictions Services Kenora    | Y | Y | Y | Y | Y | Y |
| Changes Recovery Home                                               | Y | Y | Y | Y | Y | Y |
| Community Counselling & Addiction Services - Red Lake               | Y | Y | Y | Y | Y | Y |
| Salvation Army Anchorage                                            | Y | Y | Y | Y | Y | N |
| Empathy House                                                       | Y | Y | Y | Y | Y | Y |
| Lifestyle Enrichment For Senior Adults (LESA)                       | Y | Y | Y | Y | Y | Y |
| St. Joseph's Care Group - Thunder Bay                               | Y | Y | Y | Y | Y | Y |
| North of Superior Community Mental Health Program Corporation       | Y | Y | Y | Y | Y | Y |
| Monarch Recovery Services                                           | Y | Y | Y | Y | Y | Y |
| Rideauwood Addiction and Family Services                            | Y | Y | Y | Y | Y | Y |
| Jean Tweed Treatment Centre                                         | Y | Y | Y | Y | Y | Y |
| Addiction Services For York Region (ASYR)                           | Y | Y | Y | Y | Y | Y |
| Alpha House                                                         | Y | Y | Y | Y | Y | Y |

|                                                                                          |   |   |   |   |   |   |
|------------------------------------------------------------------------------------------|---|---|---|---|---|---|
| North York General Hospital - Transitional Aged Youth Substance Use Program              | Y | Y | Y | Y | Y | Y |
| Riverside Community Addiction Services                                                   | Y | Y | Y | Y | Y | Y |
| Addiction & Mental Health Services - Kingston, Frontenac, Lennox & Addington             | Y | Y | Y | Y | Y | Y |
| Health Sciences North/Horizon Santé-Nord                                                 | Y | Y | Y | Y | Y | Y |
| Royal Ottawa Mental Health Centre Substance Use and Concurrent Disorders Program         | Y | Y | Y | Y | Y | Y |
| Salvation Army Homestead                                                                 | Y | Y | Y | Y | Y | Y |
| Salvation Army Harbour Light Centre                                                      | Y | Y | Y | Y | Y | Y |
| Amethyst Women's Addiction Centre                                                        | Y | Y | Y | Y | Y | Y |
| Maison Fraternité                                                                        | Y | Y | Y | Y | Y | Y |
| Centre for Addiction & Mental Health (CAMH) - Problem Gambling Service                   | Y | Y | Y | Y | Y | Y |
| Centre for Addiction & Mental Health (CAMH) - Substance Abuse Programs (Including MAARS) | Y | Y | Y | Y | Y | Y |
| CAMH - Substance Abuse Programs                                                          | Y | Y | Y | Y | N | N |
| Thunder Bay Counselling Centre - Alcohol and Other Drugs Assessment Program              | Y | Y | Y | Y | Y | Y |
| Vitanova Foundation                                                                      | Y | Y | Y | Y | Y | Y |
| Caritas School of Life                                                                   | Y | Y | Y | Y | Y | Y |
| Ozanam House                                                                             | Y | Y | Y | Y | Y | Y |
| Dave Smith Youth Treatment Centre                                                        | Y | Y | Y | Y | Y | Y |
| Thunder Bay Seaway Non-Profit Apartments                                                 | Y | Y | N | N | N | N |
| Reverend Tommy Beardy Memorial Wee Che He Wayo-Gamik Family Treatment Centre             | Y | Y | Y | Y | Y | Y |
| Corner, A Community Drop-In Centre (The)                                                 | Y | Y | Y | Y | Y | Y |
| William Osler Health Centre                                                              | Y | Y | Y | Y | Y | Y |
| Renascent Centres (The)                                                                  | Y | Y | Y | Y | Y | Y |
| LOFT Community Services - Ingles House                                                   | Y | Y | Y | Y | Y | Y |
| Transition House                                                                         | Y | Y | Y | Y | Y | Y |
| Suntrac Recovery (A Division of Mission Services Hamilton)                               | Y | Y | Y | Y | Y | Y |

Imtiaz S, Kurdyak P, Samkhvalov AV, et al. Trends in treatment of problematic cannabis use in Ontario's specialized addiction treatment system from 2010/11 to 2015/16: a repeated cross-sectional study of a health administrative database. *CMAJ Open* 2018. doi: 10.9778/cmajo.20170152. Copyright© 2018 Joule Inc. or its licensors

|                                                                                    |   |   |   |   |   |   |
|------------------------------------------------------------------------------------|---|---|---|---|---|---|
| New Experiences                                                                    | Y | Y | Y | Y | Y | Y |
| COSTI Immigrant Services                                                           | Y | Y | Y | Y | Y | Y |
| University Health Network / Toronto Western Hospital, Mental Health and Addictions | Y | Y | Y | Y | Y | Y |
| K.C.A. Addictions and Mental Health                                                | Y | Y | Y | Y | Y | Y |
| Manitoulin Community Withdrawal Management Service                                 | Y | Y | Y | Y | Y | Y |
| Turning Point Decisif                                                              | Y | Y | Y | Y | Y | Y |
| Chinese Family Services of Ontario                                                 | Y | Y | Y | Y | Y | Y |
| United Native Friendship Centre                                                    | Y | Y | Y | Y | Y | Y |
| Nishnawbe-Gamik Friendship Centre                                                  | Y | Y | Y | Y | Y | Y |
| North Bay Indian Friendship Centre                                                 | Y | Y | Y | Y | Y | Y |
| Georgian Bay Native Friendship Centre                                              | Y | Y | Y | Y | Y | N |
| N'Amerind Friendship Centre                                                        | Y | Y | Y | Y | Y | Y |
| Fort Erie Native Friendship Centre                                                 | Y | Y | Y | Y | N | N |
| CanAm Indian Friendship Centre                                                     | Y | Y | Y | Y | Y | Y |
| Thunder Bay Indian Friendship Centre                                               | Y | Y | Y | Y | Y | N |
| Indian Friendship Centre Sault Ste. Marie                                          | Y | Y | Y | Y | Y | N |
| Hamilton Regional Indian Friendship Centre                                         | Y | Y | Y | Y | Y | Y |
| Timmins Native Friendship Centre                                                   | Y | Y | Y | Y | N | Y |
| The Salvation Army Centre of Hope Withdrawal Management Centre                     | Y | Y | Y | Y | Y | Y |
| North Kingston Community Health Centre - Street Health Program                     | N | Y | Y | Y | Y | Y |
| Kingston Community Health Centre                                                   | N | N | N | Y | Y | Y |
| Ray of Hope Inc, Youth 180                                                         | Y | Y | Y | Y | Y | Y |
| Toronto Public Health - The Works                                                  | Y | Y | Y | Y | Y | Y |
| Weeneebayko Health Athuskaywin Authority (WHHA)                                    | Y | Y | Y | Y | N | N |
| Pine River Institute                                                               | Y | Y | Y | Y | Y | Y |
| Windsor Essex Community Health Centre – Erie St. Clair Clinic                      | Y | N | N | N | N | N |
| Canadian Mental Health Association - Muskoka Parry Sound                           | Y | Y | Y | Y | Y | Y |
| Good Shepherd Non-Profit Homes Inc.                                                | Y | Y | Y | Y | Y | Y |
| Reconnect Community Health Services                                                | Y | Y | Y | Y | Y | Y |

Imtiaz S, Kurdyak P, Samkhvalov AV, et al. Trends in treatment of problematic cannabis use in Ontario's specialized addiction treatment system from 2010/11 to 2015/16: a repeated cross-sectional study of a health administrative database. *CMAJ Open* 2018. doi: 10.9778/cmajo.20170152. Copyright© 2018 Joule Inc. or its licensors

|                                                                |   |   |   |   |   |   |
|----------------------------------------------------------------|---|---|---|---|---|---|
| Alpha Court Community Mental Health Services                   | Y | Y | Y | Y | Y | Y |
| Hotel-Dieu Grace Healthcare                                    | Y | Y | Y | Y | Y | Y |
| Hotel-Dieu Grace Healthcare                                    | Y | Y | Y | Y | Y | Y |
| Canadian Mental Health Association Peel Branch                 | N | N | Y | Y | Y | Y |
| Canadian Mental Health Association and Timiskaming Health Unit | Y | Y | Y | Y | Y | Y |
| Addiction Service of Prescott-Russell                          | Y | Y | Y | Y | Y | Y |
| Family Transition Place                                        | N | N | N | Y | Y | Y |
| Canadian Mental Health Association, Fort Frances Branch        | N | N | N | N | N | Y |
| Canadian Mental Health Association - Ottawa Branch             | Y | Y | Y | Y | Y | N |
| Punjabi Community Health Services                              | Y | Y | Y | Y | Y | Y |
| North Bay Regional Health Centre                               | Y | Y | Y | Y | Y | Y |
| Fred Victor                                                    | N | Y | Y | Y | Y | Y |
| Chatham-Kent Community Health Centre                           | N | Y | N | N | N | N |
| Erie-St. Clair Clinic                                          | N | N | Y | Y | Y | Y |
| Bluewater Methadone Clinic                                     | Y | Y | Y | Y | Y | Y |
| Leamington District Memorial Hospital                          | N | N | Y | Y | Y | Y |
| Black Creek Community Health Centre                            | N | N | N | Y | Y | Y |
| Quest Community Health Centre                                  | N | N | N | Y | Y | Y |
| Senior Persons Living Connected                                | Y | Y | Y | Y | Y | Y |
| Good Shepherd Refuge Social Ministries                         | N | N | N | Y | Y | Y |
| Belleville and Quinte West Community Health Centre             | N | N | N | Y | Y | Y |
| Rideau Community Health Services                               | N | N | N | Y | Y | Y |



**Table S2: Trends in clients among the cannabis only and cannabis plus groups between 2010/11 – 2015/16**

| Year                       | Cannabis Only  |             |                             |             | Cannabis Plus  |               |                             |               |
|----------------------------|----------------|-------------|-----------------------------|-------------|----------------|---------------|-----------------------------|---------------|
|                            | New Admissions |             | Total Caseload <sup>^</sup> |             | New Admissions |               | Total Caseload <sup>^</sup> |               |
|                            | N              | 95% CI      | N                           | 95% CI      | N              | 95% CI        | N                           | 95% CI        |
| 2010/11                    | 2954           | 2848 - 3062 | -                           | -           | 15451          | 15208 - 15697 | -                           | -             |
| 2011/12                    | 3086           | 2978 - 3197 | 4188                        | 4062 - 4317 | 15966          | 15719 - 16216 | 20139                       | 19862 - 20419 |
| 2012/13                    | 2751           | 2649 - 2856 | 3978                        | 3855 - 4104 | 15441          | 15198 - 15687 | 20264                       | 19986 - 20545 |
| 2013/14                    | 2689           | 2588 - 2793 | 3892                        | 3771 - 4016 | 15918          | 15672 - 16167 | 21105                       | 20821 - 21392 |
| 2014/15                    | 2667           | 2567 - 2770 | 3889                        | 3768 - 4013 | 15545          | 15302 - 15791 | 21569                       | 21282 - 21859 |
| 2015/16                    | 2342           | 2248 - 2439 | 3650                        | 3533 - 3770 | 15280          | 15039 - 15524 | 21816                       | 21527 - 22107 |
| <b>P-Value<sup>~</sup></b> | 0.012          |             | 0.013                       |             | 0.543          |               | 0.005                       |               |

Abbreviations: *CI*: confidence interval

<sup>^</sup> Total caseload estimates were not generated for 2010/11

<sup>~</sup> P-value obtained from the linear trend test

**Figure S1: Flow diagram of selection of data from the Drug and Alcohol Treatment Information System between 2010/11 to 2015/16**

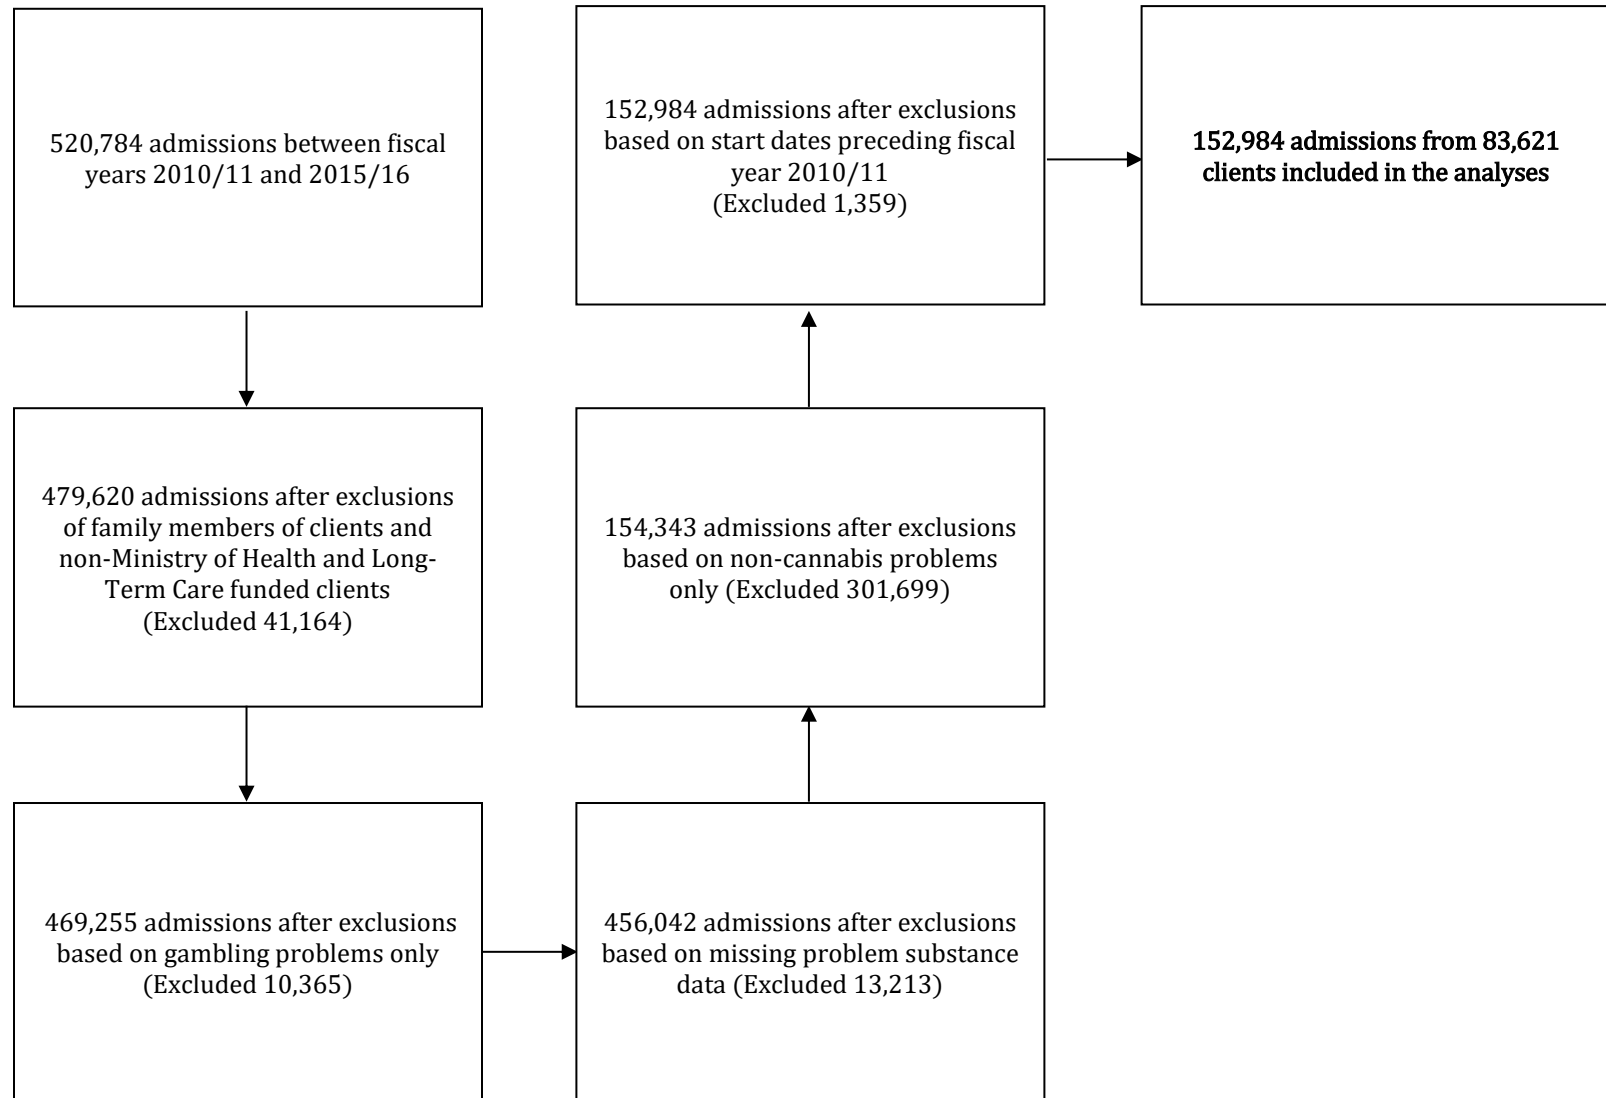

Supplement: 2017-0152-1-at.pdf [file 2017-0152-1-at.pdf]
